# Supplementary material for: Beverage Consumption Patterns among U.S. Adolescents and Adults from a New 24-h Beverage Recall Survey Compared to the National Health and Nutrition Examination Survey (NHANES) 2017–2018
Source: MDPI journal article supplement (doi:10.3390/nu15163561), 2023-08-12
Supplement: s1 [file s1]

Supplemental Methods

*Identification of outliers in (or questionable entries from) the 24-hr consumption in ABA-BSW*

Since ABA-BSW was an online questionnaire and therefore by design did not allow for immediate or in-person confirmation of the reported information (i.e., it was not an AMPM approach), respondents were excluded from the current study if their reported intakes were deemed unreliable as compared to the distribution of the consumption patterns observed from the NHANES 2017-2018 day 1 dietary recall. The total daily intake of the 13 beverage types in NHANES ranged from 16 mL to 12728 mL when excluding tap water and 60 mL to 15696 mL when including tap water. There were no more than six COs for any beverage during any of the six time intervals. Since ABA-BSW included a larger number of participants than in the NHANES subsample of participants ages 13-64 y, it is possible that both lower and higher total daily intakes and number of COs per time interval could be observed in ABA-BSW as compared to the minimums and maximums observed in NHANES. Therefore, ABA-BSW survey participants whose total daily beverage amount (excluding tap water) exceeded 16000 mL or who had more than 10 COs during any time interval were identified as having potentially unreliable dietary recalls and were excluded from the current analysis. Less than 1% (n=158) of the 20,711 participants were excluded due to: exceedance of total daily volume (n=12), exceedance of COs/interval (n=122), and exceedance of both (n=24). The final ABA-BSW survey sample used for the current analysis was therefore 20,553.

Supplemental Table S1. Full list of NHANES eight-digit food codes mapped to thirteen Beverage Types

| <u>Beverage Type</u>         | <u>NHANES Food Code (8-digit and Name)</u> |
|------------------------------|--------------------------------------------|
| <b>Bottled water</b>         | 92410210 Carbonated water, unsweetened     |
|                              | 94100100 Water, bottled, unsweetened       |
| <b>Carbonated Soft drink</b> | 92400000 Soft drink, NFS                   |
|                              | 92400100 Soft drink, NFS, diet             |

Xiaoyu Bi -- Beverage consumption patterns among U.S. adolescents and adults from a 24-hour dietary recall survey conducted in 2021 compared to the National Health and Nutrition Examination Survey (NHANES) 2017-2018

|               |                                                                |
|---------------|----------------------------------------------------------------|
|               | 92410310 Soft drink, cola                                      |
|               | 92410315 Soft drink, cola, reduced sugar                       |
|               | 92410320 Soft drink, cola, diet                                |
|               | 92410330 Soft drink, cola-type, with higher caffeine           |
|               | 92410340 Soft drink, cola, decaffeinated                       |
|               | 92410350 Soft drink, cola, decaffeinated, diet                 |
|               | 92410360 Soft drink, pepper type                               |
|               | 92410370 Soft drink, pepper type, diet                         |
|               | 92410390 Soft drink, pepper type, decaffeinated                |
|               | 92410400 Soft drink, pepper type, decaffeinated, diet          |
|               | 92410410 Soft drink, cream soda                                |
|               | 92410420 Soft drink, cream soda, diet                          |
|               | 92410510 Soft drink, fruit flavored, caffeine free             |
|               | 92410520 Soft drink, fruit flavored, diet, caffeine free       |
|               | 92410550 Soft drink, fruit flavored, caffeine containing       |
|               | 92410560 Soft drink, fruit flavored, caffeine containing, diet |
|               | 92410610 Soft drink, ginger ale                                |
|               | 92410620 Soft drink, ginger ale, diet                          |
|               | 92410710 Soft drink, root beer                                 |
|               | 92410720 Soft drink, root beer, diet                           |
|               | 92410810 Soft drink, chocolate flavored                        |
|               | 92410820 Soft drink, chocolate flavored, diet                  |
|               | 92411510 Soft drink, cola, fruit or vanilla flavored           |
|               | 92411610 Soft drink, cola, fruit or vanilla flavored, diet     |
|               | 92416010 Mavi drink                                            |
|               | 92417010 Soft drink, ale type                                  |
|               | 92431000 Carbonated juice drink, NS as to type of juice        |
|               | 92432000 Fruit juice drink, citrus, carbonated                 |
|               | 92433000 Fruit juice drink, non citrus, carbonated             |
| <b>Coffee</b> | 11561000 Cafe con leche                                        |
|               | 11561010 Cafe con leche prepared with sugar                    |
|               | 92100000 Coffee, NS as to type                                 |
|               | 92100500 Coffee, NS as to brewed or instant                    |
|               | 92101000 Coffee, brewed                                        |
|               | 92101500 Coffee, brewed, blend of regular and decaffeinated    |
|               | 92101600 Coffee, Turkish                                       |
|               | 92101610 Coffee, espresso                                      |
|               | 92101630 Coffee, espresso, decaffeinated                       |
|               | 92101700 Coffee, brewed, flavored                              |
|               | 92101800 Coffee, Cuban                                         |
|               | 92101810 Coffee, macchiato                                     |
|               | 92101820 Coffee, macchiato, sweetened                          |

Xiaoyu Bi -- Beverage consumption patterns among U.S. adolescents and adults from a 24-hour dietary recall survey conducted in 2021 compared to the National Health and Nutrition Examination Survey (NHANES) 2017-2018

|          |                                                                  |
|----------|------------------------------------------------------------------|
| 92101850 | Coffee, cafe con leche                                           |
| 92101851 | Coffee, cafe con leche, decaffeinated                            |
| 92101900 | Coffee, Latte                                                    |
| 92101901 | Coffee, Latte, nonfat                                            |
| 92101903 | Coffee, Latte, with non-dairy milk                               |
| 92101904 | Coffee, Latte, flavored                                          |
| 92101905 | Coffee, Latte, nonfat, flavored                                  |
| 92101906 | Coffee, Latte, with non-dairy milk, flavored                     |
| 92101910 | Coffee, Latte, decaffeinated                                     |
| 92101911 | Coffee, Latte, decaffeinated, nonfat                             |
| 92101917 | Coffee, Latte, decaffeinated, flavored                           |
| 92101918 | Coffee, Latte, decaffeinated, nonfat, flavored                   |
| 92101920 | Frozen coffee drink                                              |
| 92101921 | Frozen coffee drink, nonfat                                      |
| 92101923 | Frozen coffee drink, with non-dairy milk                         |
| 92101925 | Frozen coffee drink, with whipped cream                          |
| 92101926 | Frozen coffee drink, nonfat, with whipped cream                  |
| 92101930 | Frozen coffee drink, decaffeinated                               |
| 92101931 | Frozen coffee drink, decaffeinated, nonfat                       |
| 92101935 | Frozen coffee drink, decaffeinated, with whipped cream           |
| 92101936 | Frozen coffee drink, decaffeinated, nonfat, with whipped cream   |
| 92101950 | Coffee, Cafe Mocha                                               |
| 92101955 | Coffee, Cafe Mocha, nonfat                                       |
| 92101960 | Coffee, Cafe Mocha, with non-dairy milk                          |
| 92101965 | Coffee, Cafe Mocha, decaffeinated                                |
| 92101970 | Coffee, Cafe Mocha, decaffeinated, nonfat                        |
| 92101975 | Coffee, Cafe Mocha, decaffeinated, with non-dairy milk           |
| 92102000 | Frozen mocha coffee drink                                        |
| 92102010 | Frozen mocha coffee drink, nonfat                                |
| 92102020 | Frozen mocha coffee drink, with non-dairy milk                   |
| 92102030 | Frozen mocha coffee drink, with whipped cream                    |
| 92102040 | Frozen mocha coffee drink, nonfat, with whipped cream            |
| 92102050 | Frozen mocha coffee drink, with non-dairy milk and whipped cream |
| 92102090 | Frozen mocha coffee drink, decaffeinated, with whipped cream     |
| 92102400 | Iced Coffee, brewed                                              |
| 92102401 | Iced Coffee, brewed, decaffeinated                               |
| 92102450 | Iced Coffee, pre-lightened and pre-sweetened                     |
| 92102500 | Coffee, Iced Latte                                               |
| 92102501 | Coffee, Iced Latte, nonfat                                       |
| 92102502 | Coffee, Iced Latte, with non-dairy milk                          |
| 92102503 | Coffee, Iced Latte, flavored                                     |
| 92102505 | Coffee, Iced Latte, with non-dairy milk, flavored                |

Xiaoyu Bi -- Beverage consumption patterns among U.S. adolescents and adults from a 24-hour dietary recall survey conducted in 2021 compared to the National Health and Nutrition Examination Survey (NHANES) 2017-2018

|          |                                                                                                                  |
|----------|------------------------------------------------------------------------------------------------------------------|
| 92102600 | Coffee, Iced Cafe Mocha                                                                                          |
| 92102602 | Coffee, Iced Cafe Mocha, with non-dairy milk                                                                     |
| 92103000 | Coffee, instant, reconstituted                                                                                   |
| 92104000 | Coffee, instant, 50% less caffeine, reconstituted                                                                |
| 92105010 | Coffee, made from liquid concentrate                                                                             |
| 92106000 | Coffee, acid neutralized, from powdered instant                                                                  |
| 92111000 | Coffee, NS as to brewed or instant, decaffeinated                                                                |
| 92111010 | Coffee, brewed, decaffeinated                                                                                    |
| 92114000 | Coffee, instant, decaffeinated, reconstituted                                                                    |
| 92121000 | Coffee, instant, pre-lightened and pre-sweetened with sugar, reconstituted                                       |
| 92121001 | Coffee, instant, decaffeinated, pre-lightened and pre-sweetened with sugar, reconstituted                        |
| 92121010 | Coffee, instant, pre-sweetened with sugar, reconstituted                                                         |
| 92121020 | Coffee, mocha, instant, pre-lightened and pre-sweetened with sugar, reconstituted                                |
| 92121030 | Coffee, mocha, instant, pre-lightened and pre-sweetened with low calorie sweetener, reconstituted                |
| 92121040 | Coffee, instant, pre-lightened and pre-sweetened with low calorie sweetener, reconstituted                       |
| 92121041 | Coffee, instant, decaffeinated, pre-lightened and pre-sweetened with low calorie sweetener, reconstituted        |
| 92121050 | Coffee, mocha, instant, decaffeinated, pre-lightened and pre-sweetened with low calorie sweetener, reconstituted |
| 92130000 | Coffee, pre-lightened and pre-sweetened with sugar                                                               |
| 92130001 | Coffee, decaffeinated, pre-lightened and pre-sweetened with sugar                                                |
| 92130005 | Coffee, pre-lightened and pre-sweetened with low calorie sweetener                                               |
| 92130006 | Coffee, decaffeinated, pre-lightened and pre-sweetened with low calorie sweetener                                |
| 92130010 | Coffee, pre-lightened                                                                                            |
| 92130011 | Coffee, decaffeinated, pre-lightened                                                                             |
| 92130020 | Coffee, pre-sweetened with sugar                                                                                 |
| 92130021 | Coffee, decaffeinated, pre-sweetened with sugar                                                                  |
| 92130030 | Coffee, pre-sweetened with low calorie sweetener                                                                 |
| 92130031 | Coffee, decaffeinated, pre-sweetened with low calorie sweetener                                                  |
| 92152000 | Coffee and chicory, brewed                                                                                       |
| 92153100 | Coffee, decaffeinated, with cereal                                                                               |
| 92161000 | Coffee, Cappuccino                                                                                               |
| 92161001 | Coffee, Cappuccino, nonfat                                                                                       |
| 92161002 | Coffee, Cappuccino, with non-dairy milk                                                                          |
| 92161005 | Cappuccino, sweetened                                                                                            |
| 92162000 | Coffee, Cappuccino, decaffeinated                                                                                |
| 92162001 | Coffee, Cappuccino, decaffeinated, nonfat                                                                        |
| 92162005 | Cappuccino, decaffeinated, sweetened                                                                             |

Xiaoyu Bi -- Beverage consumption patterns among U.S. adolescents and adults from a 24-hour dietary recall survey conducted in 2021 compared to the National Health and Nutrition Examination Survey (NHANES) 2017-2018

|                           |                                                                                                                               |
|---------------------------|-------------------------------------------------------------------------------------------------------------------------------|
|                           | 92171000 Coffee, bottled/canned                                                                                               |
|                           | 92171010 Coffee, bottled/canned, light                                                                                        |
|                           | 92191000 Coffee, dry instant powder, NS as to regular or decaffeinated                                                        |
|                           | 92191100 Coffee, instant, not reconstituted                                                                                   |
|                           | 92191200 Coffee, instant, decaffeinated, not reconstituted                                                                    |
|                           | 92191250 Coffee, dry, acid neutralized                                                                                        |
|                           | 92191400 Coffee, instant, pre-sweetened with sugar, not reconstituted                                                         |
|                           | 92192000 Coffee, mocha, instant, pre-lightened and pre-sweetened with sugar, not reconstituted                                |
|                           | 92192040 Coffee, mocha, instant, decaffeinated, pre-lightened and pre-sweetened with low calorie sweetener, not reconstituted |
|                           | 92193000 Coffee, instant, pre-lightened and pre-sweetened with sugar, not reconstituted                                       |
|                           | 92193005 Coffee, instant, decaffeinated, pre-lightened and pre-sweetened with sugar, not reconstituted                        |
|                           | 92193020 Coffee, instant, pre-lightened and pre-sweetened with low calorie sweetener, not reconstituted                       |
| <b>Dairy-Based Drinks</b> | 11115400 Kefir, NS as to fat content                                                                                          |
|                           | 11436000 Yogurt, liquid                                                                                                       |
|                           | 11511000 Chocolate milk, NFS                                                                                                  |
|                           | 11511100 Chocolate milk, ready to drink, whole                                                                                |
|                           | 11511200 Chocolate milk, ready to drink, reduced fat                                                                          |
|                           | 11511300 Chocolate milk, ready to drink, fat free                                                                             |
|                           | 11511400 Chocolate milk, ready to drink, low fat                                                                              |
|                           | 11511550 Chocolate milk, ready to drink, reduced sugar, NS as to milk                                                         |
|                           | 11511600 Chocolate milk, ready to drink, low fat (Nesquik)                                                                    |
|                           | 11511610 Chocolate milk, ready to drink, fat free (Nesquik)                                                                   |
|                           | 11511700 Chocolate milk, ready to drink, low fat, no sugar added (Nesquik)                                                    |
|                           | 11512000 Cocoa, hot chocolate, not from dry mix, made with whole milk                                                         |
|                           | 11512010 Hot chocolate / Cocoa, ready to drink                                                                                |
|                           | 11512020 Hot chocolate / Cocoa, ready to drink, made with nonfat milk                                                         |
|                           | 11512100 Hot chocolate / Cocoa, ready to drink, with whipped cream                                                            |
|                           | 11512110 Hot chocolate / Cocoa, ready to drink, made with nonfat milk and whipped cream                                       |
|                           | 11512500 Hot chocolate, Puerto Rican style, made with whole milk                                                              |
|                           | 11512510 Hot chocolate, Puerto Rican style, made with low fat milk                                                            |
|                           | 11513000 Chocolate milk, made from dry mix, NS as to type of milk                                                             |
|                           | 11513100 Chocolate milk, made from dry mix with whole milk                                                                    |
|                           | 11513150 Chocolate milk, made from dry mix with reduced fat milk                                                              |
|                           | 11513200 Chocolate milk, made from dry mix with low fat milk                                                                  |
|                           | 11513300 Chocolate milk, made from dry mix with fat free milk                                                                 |
|                           | 11513355 Chocolate milk, made from reduced sugar mix with whole milk                                                          |
|                           | 11513360 Chocolate milk, made from reduced sugar mix with reduced fat milk                                                    |

Xiaoyu Bi -- Beverage consumption patterns among U.S. adolescents and adults from a 24-hour dietary recall survey conducted in 2021 compared to the National Health and Nutrition Examination Survey (NHANES) 2017-2018

|          |                                                                                      |
|----------|--------------------------------------------------------------------------------------|
| 11513365 | Chocolate milk, made from reduced sugar mix with low fat milk                        |
| 11513380 | Chocolate milk, made from dry mix, NS as to type of milk (Nesquik)                   |
| 11513381 | Chocolate milk, made from dry mix with whole milk (Nesquik)                          |
| 11513382 | Chocolate milk, made from dry mix with reduced fat milk (Nesquik)                    |
| 11513383 | Chocolate milk, made from dry mix with low fat milk (Nesquik)                        |
| 11513384 | Chocolate milk, made from dry mix with fat free milk (Nesquik)                       |
| 11513391 | Chocolate milk, made from no sugar added dry mix with whole milk (Nesquik)           |
| 11513392 | Chocolate milk, made from no sugar added dry mix with reduced fat milk (Nesquik)     |
| 11513393 | Chocolate milk, made from no sugar added dry mix with low fat milk (Nesquik)         |
| 11513394 | Chocolate milk, made from no sugar added dry mix with fat free milk (Nesquik)        |
| 11513400 | Chocolate milk, made from syrup, NS as to type of milk                               |
| 11513500 | Chocolate milk, made from syrup with whole milk                                      |
| 11513550 | Chocolate milk, made from syrup with reduced fat milk                                |
| 11513600 | Chocolate milk, made from syrup with low fat milk                                    |
| 11513700 | Chocolate milk, made from syrup with fat free milk                                   |
| 11513801 | Chocolate milk, made from light syrup with whole milk                                |
| 11513802 | Chocolate milk, made from light syrup with reduced fat milk                          |
| 11513803 | Chocolate milk, made from light syrup with low fat milk                              |
| 11513804 | Chocolate milk, made from light syrup with fat free milk                             |
| 11513851 | Chocolate milk, made from sugar free syrup with whole milk                           |
| 11513853 | Chocolate milk, made from sugar free syrup with low fat milk                         |
| 11514100 | Hot chocolate / Cocoa, made with dry mix and water                                   |
| 11514110 | Hot chocolate / Cocoa, made with dry mix and whole milk                              |
| 11514120 | Hot chocolate / Cocoa, made with dry mix and reduced fat milk                        |
| 11514130 | Hot chocolate / Cocoa, made with dry mix and low fat milk                            |
| 11514140 | Hot chocolate / Cocoa, made with dry mix and fat free milk                           |
| 11514300 | Cocoa with nonfat dry milk and low calorie sweetener, mixture, water added           |
| 11514310 | Hot chocolate / Cocoa, made with no sugar added dry mix and water                    |
| 11514320 | Hot chocolate / Cocoa, made with no sugar added dry mix and whole milk               |
| 11514330 | Hot chocolate / Cocoa, made with no sugar added dry mix and reduced fat milk         |
| 11514340 | Hot chocolate / Cocoa, made with no sugar added dry mix and low fat milk             |
| 11514350 | Hot chocolate / Cocoa, made with no sugar added dry mix and fat free milk            |
| 11514500 | Cocoa, whey, and low calorie sweetener, mixture, fortified, water added              |
| 11516000 | Cocoa, whey, and low-calorie sweetener mixture, low fat milk added                   |
| 11518000 | Milk beverage with nonfat dry milk and low calorie sweetener, water added, chocolate |
| 11519000 | Milk beverage, made with whole milk, flavors other than chocolate                    |

Xiaoyu Bi -- Beverage consumption patterns among U.S. adolescents and adults from a 24-hour dietary recall survey conducted in 2021 compared to the National Health and Nutrition Examination Survey (NHANES) 2017-2018

|                      |                                                                                  |
|----------------------|----------------------------------------------------------------------------------|
|                      | 11519040 Strawberry milk, NFS                                                    |
|                      | 11519050 Strawberry milk, whole                                                  |
|                      | 11519105 Strawberry milk, reduced fat                                            |
|                      | 11519200 Strawberry milk, low fat                                                |
|                      | 11519205 Strawberry milk, fat free                                               |
|                      | 11519210 Strawberry milk, reduced sugar                                          |
|                      | 11520000 Milk, malted, unfortified, NS as to flavor, made with milk              |
|                      | 11521000 Milk, malted, unfortified, chocolate, made with milk                    |
|                      | 11522000 Milk, malted, unfortified, natural flavor, made with milk               |
|                      | 11525000 Milk, malted, natural flavor, made with milk                            |
|                      | 11526000 Milk, malted                                                            |
|                      | 11527000 Milk, malted, fortified, NS as to flavor, made with milk                |
|                      | 11531000 Eggnog, regular                                                         |
|                      | 11531500 Eggnog, low fat / light                                                 |
|                      | 11543000 Milk shake, bottled, chocolate                                          |
|                      | 11543010 Milk shake, bottled, flavors other than chocolate                       |
|                      | 11551050 Licuado or Batido                                                       |
|                      | 11553000 Fruit smoothie drink, made with fruit or fruit juice and dairy products |
|                      | 11553100 Fruit smoothie, NFS                                                     |
|                      | 11553110 Fruit smoothie, with whole fruit and dairy                              |
|                      | 11553120 Fruit smoothie, with whole fruit and dairy, added protein               |
|                      | 11553130 Fruit smoothie juice drink, with dairy                                  |
|                      | 11560000 Chocolate milk drink                                                    |
|                      | 11560020 Flavored milk drink, whey- and milk-based, flavors other than chocolate |
|                      | 64134100 Fruit smoothie, light                                                   |
|                      | 78101110 Fruit and vegetable smoothie, added protein                             |
| <b>Energy Drinks</b> | 92650000 Red Bull Energy Drink                                                   |
|                      | 92650005 Red Bull Energy Drink, sugar-free                                       |
|                      | 92650100 Full Throttle Energy Drink                                              |
|                      | 92650200 Monster Energy Drink                                                    |
|                      | 92650205 Mountain Dew AMP Energy Drink                                           |
|                      | 92650210 Mountain Dew AMP Energy Drink, sugar-free                               |
|                      | 92650700 Rockstar Energy Drink                                                   |
|                      | 92650705 Rockstar Energy Drink, sugar-free                                       |
|                      | 92650800 Vault Energy Drink                                                      |
|                      | 92650805 Vault Zero Energy drink                                                 |
|                      | 92651000 Energy drink                                                            |
|                      | 95310200 Energy drink (Full Throttle)                                            |
|                      | 95310400 Energy drink (Monster)                                                  |
|                      | 95310500 Energy drink (Mountain Dew AMP)                                         |
|                      | 95310560 Energy drink (NOS)                                                      |
|                      | 95310600 Energy drink (Red Bull)                                                 |

Xiaoyu Bi -- Beverage consumption patterns among U.S. adolescents and adults from a 24-hour dietary recall survey conducted in 2021 compared to the National Health and Nutrition Examination Survey (NHANES) 2017-2018

|                              |                                                                                                               |
|------------------------------|---------------------------------------------------------------------------------------------------------------|
|                              | 95310700 Energy drink (Rockstar)                                                                              |
|                              | 95310750 Energy drink (SoBe Energize Energy Juice Drink)                                                      |
|                              | 95310800 Energy drink (Vault)                                                                                 |
|                              | 95311000 Energy Drink                                                                                         |
|                              | 95312400 Energy drink, low calorie (Monster)                                                                  |
|                              | 95312410 Energy drink, sugar free (Monster)                                                                   |
|                              | 95312500 Energy drink, sugar free (Mountain Dew AMP)                                                          |
|                              | 95312550 Energy drink, sugar free (No Fear)                                                                   |
|                              | 95312560 Energy drink (Ocean Spray Cran-Energy Juice Drink)                                                   |
|                              | 95312600 Energy drink, sugar-free (Red Bull)                                                                  |
|                              | 95312700 Energy drink, sugar free (Rockstar)                                                                  |
|                              | 95312800 Energy drink, sugar free (Vault)                                                                     |
|                              | 95312900 Energy drink (XS)                                                                                    |
|                              | 95313200 Energy drink, sugar free                                                                             |
| <b>Flavored Water</b>        | 92410110 Carbonated water, sweetened                                                                          |
|                              | 92410250 Carbonated water, sweetened, with low-calorie or no-calorie sweetener                                |
|                              | 94100200 Water, bottled, sweetened, with low calorie sweetener                                                |
|                              | 94100300 Water, bottled, flavored (Capri Sun Roarin' Waters)                                                  |
|                              | 94210100 Water, bottled, flavored (Propel Water)                                                              |
|                              | 94210200 Water, bottled, flavored (Glaceau Vitamin Water)                                                     |
|                              | 94210300 Water, bottled, flavored (SoBe Life Water)                                                           |
|                              | 94220100 Propel Zero Water                                                                                    |
|                              | 94220200 Glaceau Water, low calorie                                                                           |
|                              | 94220215 Water, bottled, flavored, sugar free (Glaceau Vitamin Water)                                         |
|                              | 94220310 Water, bottled, flavored, sugar free (SoBe)                                                          |
| <b>Nutritional Beverages</b> | 11611000 Instant breakfast, fluid, canned                                                                     |
|                              | 11612000 Instant breakfast, powder, milk added                                                                |
|                              | 11613000 Instant breakfast, powder, sweetened with low calorie sweetener, milk added                          |
|                              | 11623000 Meal supplement or replacement, commercially prepared, ready-to-drink                                |
|                              | 11631000 High calorie beverage, canned or powdered, reconstituted                                             |
|                              | 11641000 Meal supplement or replacement, milk-based, high protein, liquid                                     |
|                              | 11641020 Meal replacement or supplement, milk based, ready-to-drink                                           |
|                              | 11830800 Instant breakfast, powder, not reconstituted                                                         |
|                              | 11830810 Instant breakfast, powder, sweetened with low calorie sweetener, not reconstituted                   |
|                              | 11830900 Protein supplement, milk-based, powdered, not reconstituted                                          |
|                              | 11830940 Meal replacement, high protein, milk based, fruit juice mixable formula, powdered, not reconstituted |
|                              | 11830970 Meal replacement, protein type, milk-based, powdered, not reconstituted                              |
|                              | 11830990 Nutrient supplement, milk-based, powdered, not reconstituted                                         |
|                              | 11831500 Nutrient supplement, milk-based, high protein, powdered, not reconstituted                           |



Xiaoyu Bi -- Beverage consumption patterns among U.S. adolescents and adults from a 24-hour dietary recall survey conducted in 2021 compared to the National Health and Nutrition Examination Survey (NHANES) 2017-2018

|          |                                                                                                                      |
|----------|----------------------------------------------------------------------------------------------------------------------|
| 11832000 | Meal replacement, protein type, milk- and soy-based, powdered, not reconstituted                                     |
| 11835100 | Meal replacement, Amway's Nutrilite brand Positrim Drink Mix, powdered nonfat dry milk-based, dry, not reconstituted |
| 11836000 | Protein supplement, milk-based, Muscle Milk, powdered, not reconstituted                                             |
| 11836100 | Protein supplement, milk-based, Muscle Milk Light, powdered, not reconstituted                                       |
| 41430000 | Protein powder, NFS                                                                                                  |
| 41430010 | Protein supplement, powdered                                                                                         |
| 41430200 | Meal replacement or supplement, soy- and milk-base, powder, reconstituted with water                                 |
| 41430310 | Protein diet powder with soy and casein                                                                              |
| 41436000 | Nutritional supplement for people with diabetes, liquid                                                              |
| 41440010 | Ensure liquid nutrition                                                                                              |
| 41440020 | Ensure with fiber, liquid                                                                                            |
| 41440050 | Ensure Plus liquid nutrition                                                                                         |
| 41440100 | Meal replacement or supplement, liquid, soy-based                                                                    |
| 95101000 | Nutritional drink or shake, ready-to-drink (Boost)                                                                   |
| 95101010 | Nutritional drink or shake, ready-to-drink (Boost Plus)                                                              |
| 95102000 | Nutritional drink or shake, ready-to-drink (Carnation Instant Breakfast)                                             |
| 95103000 | Nutritional drink or shake, ready-to-drink (Ensure)                                                                  |
| 95103010 | Nutritional drink or shake, ready-to-drink (Ensure Plus)                                                             |
| 95104000 | Nutritional drink or shake, ready-to-drink, sugar free (Glucerna)                                                    |
| 95105000 | Nutritional drink or shake, ready-to-drink (Kellogg's Special K Protein)                                             |
| 95106000 | Nutritional drink or shake, ready-to-drink (Muscle Milk)                                                             |
| 95106010 | Nutritional drink or shake, ready-to-drink, light (Muscle Milk)                                                      |
| 95110000 | Nutritional drink or shake, ready-to-drink (Slim Fast)                                                               |
| 95110010 | Nutritional drink or shake, ready-to-drink, sugar free (Slim Fast)                                                   |
| 95110020 | Nutritional drink or shake, high protein, ready-to-drink (Slim Fast)                                                 |
| 95120000 | Nutritional drink or shake, ready-to-drink, NFS                                                                      |
| 95120010 | Nutritional drink or shake, high protein, ready-to-drink, NFS                                                        |
| 95120020 | Nutritional drink or shake, high protein, light, ready-to-drink, NFS                                                 |
| 95120050 | Nutritional drink or shake, liquid, soy-based                                                                        |
| 95201000 | Nutritional powder mix (Carnation Instant Breakfast)                                                                 |
| 95201010 | Nutritional powder mix, sugar free (Carnation Instant Breakfast)                                                     |
| 95201200 | Nutritional powder mix (EAS Whey Protein Powder)                                                                     |
| 95201300 | Nutritional powder mix (EAS Soy Protein Powder)                                                                      |
| 95201500 | Nutritional powder mix, high protein (Herbalife)                                                                     |
| 95201600 | Nutritional powder mix (Isopure)                                                                                     |
| 95201700 | Nutritional powder mix (Kellogg's Special K20 Protein Water)                                                         |
| 95202000 | Nutritional powder mix (Muscle Milk)                                                                                 |
| 95202010 | Nutritional powder mix, light (Muscle Milk)                                                                          |
| 95210000 | Nutritional powder mix (Slim Fast)                                                                                   |

Xiaoyu Bi -- Beverage consumption patterns among U.S. adolescents and adults from a 24-hour dietary recall survey conducted in 2021 compared to the National Health and Nutrition Examination Survey (NHANES) 2017-2018

|                                          |                                                                                                                                        |
|------------------------------------------|----------------------------------------------------------------------------------------------------------------------------------------|
|                                          | 95210020 Nutritional powder mix, high protein (Slim Fast)                                                                              |
|                                          | 95220000 Nutritional powder mix, NFS                                                                                                   |
|                                          | 95220010 Nutritional powder mix, high protein, NFS                                                                                     |
|                                          | 95230000 Nutritional powder mix, whey based, NFS                                                                                       |
|                                          | 95230010 Nutritional powder mix, protein, soy based, NFS                                                                               |
|                                          | 95230020 Nutritional powder mix, protein, light, NFS                                                                                   |
|                                          | 95230030 Nutritional powder mix, protein, NFS                                                                                          |
| <b>Plain Milk consumed as a beverage</b> | 11100000 Milk, NFS                                                                                                                     |
|                                          | 11111000 Milk, whole                                                                                                                   |
|                                          | 11111100 Milk, low sodium, whole                                                                                                       |
|                                          | 11111150 Milk, calcium fortified, whole                                                                                                |
|                                          | 11111160 Milk, calcium fortified, low fat (1%)                                                                                         |
|                                          | 11111170 Milk, calcium fortified, fat free (skim)                                                                                      |
|                                          | 11112000 Milk, cow's, fluid, other than whole, NS as to 2%, 1%, or skim (formerly milk, cow's, fluid, "low fat", NS as to percent fat) |
|                                          | 11112110 Milk, reduced fat (2%)                                                                                                        |
|                                          | 11112120 Milk, acidophilus, low fat (1%)                                                                                               |
|                                          | 11112130 Milk, acidophilus, reduced fat (2%)                                                                                           |
|                                          | 11112210 Milk, low fat (1%)                                                                                                            |
|                                          | 11113000 Milk, fat free (skim)                                                                                                         |
|                                          | 11114300 Milk, lactose free, low fat (1%)                                                                                              |
|                                          | 11114320 Milk, lactose free, fat free (skim)                                                                                           |
|                                          | 11114330 Milk, lactose free, reduced fat (2%)                                                                                          |
|                                          | 11114350 Milk, lactose free, whole                                                                                                     |
|                                          | 11116000 Goat's milk, whole                                                                                                            |
| <b>Plant-Based Drinks</b>                | 11310000 Milk, imitation, fluid, soy based                                                                                             |
|                                          | 11320000 Soy milk                                                                                                                      |
|                                          | 11320100 Soy milk, light                                                                                                               |
|                                          | 11320200 Soy milk, nonfat                                                                                                              |
|                                          | 11321000 Soy milk, chocolate                                                                                                           |
|                                          | 11321100 Soy milk, light, chocolate                                                                                                    |
|                                          | 11321200 Soy milk, nonfat, chocolate                                                                                                   |
|                                          | 11330000 Milk, soy, dry, reconstituted, not baby's                                                                                     |
|                                          | 11340000 Imitation milk, non-soy, sweetened                                                                                            |
|                                          | 11350000 Almond milk, sweetened                                                                                                        |
|                                          | 11350010 Almond milk, sweetened, chocolate                                                                                             |
|                                          | 11350020 Almond milk, unsweetened                                                                                                      |
|                                          | 11350030 Almond milk, unsweetened, chocolate                                                                                           |
|                                          | 11360000 Rice milk                                                                                                                     |
|                                          | 11370000 Coconut milk                                                                                                                  |
|                                          | 11512030 Hot chocolate / Cocoa, ready to drink, made with non-dairy milk                                                               |

Xiaoyu Bi -- Beverage consumption patterns among U.S. adolescents and adults from a 24-hour dietary recall survey conducted in 2021 compared to the National Health and Nutrition Examination Survey (NHANES) 2017-2018

|                                               |                                                                                            |
|-----------------------------------------------|--------------------------------------------------------------------------------------------|
|                                               | 11512120 Hot chocolate / Cocoa, ready to drink, made with non-dairy milk and whipped cream |
|                                               | 11513310 Chocolate milk, made from dry mix with non-dairy milk                             |
|                                               | 11513395 Chocolate milk, made from no sugar added dry mix with non-dairy milk (Nesquik)    |
|                                               | 11513750 Chocolate milk, made from syrup with non-dairy milk                               |
|                                               | 11513805 Chocolate milk, made from light syrup with non-dairy milk                         |
|                                               | 11514150 Hot chocolate / Cocoa, made with dry mix and non-dairy milk                       |
|                                               | 11514360 Hot chocolate / Cocoa, made with no sugar added dry mix and non-dairy milk        |
|                                               | 11519215 Strawberry milk, non-dairy                                                        |
|                                               | 92205000 Rice beverage                                                                     |
| <b>Plant water</b>                            | 42403010 Coconut water, unsweetened                                                        |
|                                               | 42404010 Coconut water, sweetened                                                          |
| <b>Sports Drinks</b>                          | 92553000 Fruit-flavored thirst quencher beverage, low calorie                              |
|                                               | 92560000 Fruit-flavored thirst quencher beverage                                           |
|                                               | 92560100 Gatorade Thirst Quencher sports drink                                             |
|                                               | 92560200 Powerade sports drink                                                             |
|                                               | 92565000 Fruit-flavored sports drink or thirst quencher beverage, low calorie              |
|                                               | 92565100 Gatorade G2 thirst quencher sports drink, low calorie                             |
|                                               | 92565200 Powerade Zero sports drink, low calorie                                           |
|                                               | 95320200 Sports drink (Gatorade G)                                                         |
|                                               | 95320500 Sports drink (Powerade)                                                           |
|                                               | 95321000 Sports drink, NFS                                                                 |
|                                               | 95322200 Sports drink, low calorie (Gatorade G2)                                           |
|                                               | 95322500 Sports drink, low calorie (Powerade Zero)                                         |
|                                               | 95323000 Sports drink, low calorie                                                         |
| <b>Still Juices and Fruit-Flavored Drinks</b> | 28401200 Gelatin drink, powder, flavored, with low-calorie sweetener, reconstituted        |
|                                               | 61201010 Grapefruit juice, 100%, freshly squeezed                                          |
|                                               | 61201020 Grapefruit juice, 100%, NS as to form                                             |
|                                               | 61201220 Grapefruit juice, 100%, canned, bottled or in a carton                            |
|                                               | 61201225 Grapefruit juice, 100%, with calcium added                                        |
|                                               | 61201620 Grapefruit juice, 100%, frozen, reconstituted                                     |
|                                               | 61210000 Orange juice, 100%, NFS                                                           |
|                                               | 61210010 Orange juice, 100%, freshly squeezed                                              |
|                                               | 61210220 Orange juice, 100%, canned, bottled or in a carton                                |
|                                               | 61210230 Orange juice, canned, bottled or in a carton, with sugar                          |
|                                               | 61210250 Orange juice, 100%, with calcium added, canned, bottled or in a carton            |
|                                               | 61210620 Orange juice, 100%, frozen, reconstituted                                         |
|                                               | 61210630 Orange juice, frozen, with sugar (reconstituted with water)                       |
|                                               | 61210820 Orange juice, 100%, with calcium added, frozen, reconstituted                     |
|                                               | 61213000 Tangerine juice, NFS                                                              |
|                                               | 61213220 Tangerine juice, 100%                                                             |

Xiaoyu Bi -- Beverage consumption patterns among U.S. adolescents and adults from a 24-hour dietary recall survey conducted in 2021 compared to the National Health and Nutrition Examination Survey (NHANES) 2017-2018

|          |                                                                               |
|----------|-------------------------------------------------------------------------------|
| 61213620 | Tangerine juice, frozen (reconstituted with water)                            |
| 61213800 | Fruit juice blend, citrus, 100% juice                                         |
| 61213900 | Fruit juice blend, citrus, 100% juice, with calcium added                     |
| 64100100 | Fruit juice, NFS                                                              |
| 64100110 | Fruit juice blend, 100% juice                                                 |
| 64100200 | Cranberry juice blend, 100% juice                                             |
| 64100220 | Cranberry juice blend, 100% juice, with calcium added                         |
| 64101010 | Apple cider                                                                   |
| 64104010 | Apple juice, 100%                                                             |
| 64104030 | Apple juice, 100%, with calcium added                                         |
| 64104600 | Blackberry juice, 100%                                                        |
| 64104610 | Blueberry juice                                                               |
| 64105400 | Cranberry juice, 100%, not a blend                                            |
| 64116020 | Grape juice, 100%                                                             |
| 64116060 | Grape juice, 100%, with calcium added                                         |
| 64120010 | Papaya juice, 100%                                                            |
| 64121000 | Passion fruit juice, 100%                                                     |
| 64124020 | Pineapple juice, 100%                                                         |
| 64126000 | Pomegranate juice, 100%                                                       |
| 64132010 | Prune juice, 100%                                                             |
| 64132500 | Strawberry juice, 100%                                                        |
| 64133100 | Watermelon juice, 100%                                                        |
| 64134000 | Fruit smoothie drink, made with fruit or fruit juice only (no dairy products) |
| 64134015 | Fruit smoothie, with whole fruit, no dairy                                    |
| 64134020 | Fruit smoothie, with whole fruit, no dairy, added protein                     |
| 64134025 | Fruit smoothie, with whole fruit, non-dairy                                   |
| 64134030 | Fruit smoothie juice drink, no dairy                                          |
| 64134200 | Fruit smoothie, bottled                                                       |
| 64200100 | Fruit nectar, NFS                                                             |
| 64201010 | Apricot nectar                                                                |
| 64201500 | Banana nectar                                                                 |
| 64202010 | Cantaloupe nectar                                                             |
| 64203020 | Guava nectar                                                                  |
| 64204010 | Mango nectar                                                                  |
| 64205010 | Peach nectar                                                                  |
| 64210010 | Papaya nectar                                                                 |
| 64213010 | Passion fruit nectar                                                          |
| 64215010 | Pear nectar                                                                   |
| 64221010 | Soursop, nectar                                                               |
| 73105000 | Beet juice                                                                    |
| 73105010 | Carrot juice, 100%                                                            |
| 74301100 | Tomato juice, 100%                                                            |

Xiaoyu Bi -- Beverage consumption patterns among U.S. adolescents and adults from a 24-hour dietary recall survey conducted in 2021 compared to the National Health and Nutrition Examination Survey (NHANES) 2017-2018

|          |                                                            |
|----------|------------------------------------------------------------|
| 74301150 | Tomato juice, 100%, low sodium                             |
| 74302000 | Tomato juice cocktail                                      |
| 74303000 | Tomato and vegetable juice, 100%                           |
| 74303100 | Tomato and vegetable juice, 100%, low sodium               |
| 74304000 | Tomato juice with clam or beef juice                       |
| 75132000 | Mixed vegetable juice                                      |
| 75132100 | Celery juice                                               |
| 75200700 | Aloe vera juice drink                                      |
| 78101000 | Vegetable and fruit juice, 100% juice, with high vitamin C |
| 78101100 | Fruit and vegetable smoothie                               |
| 78101115 | Fruit and vegetable smoothie, non-dairy                    |
| 78101118 | Fruit and vegetable smoothie, non-dairy, added protein     |
| 78101120 | Fruit and vegetable smoothie, bottled                      |
| 78101125 | Fruit and vegetable smoothie, no dairy                     |
| 78101130 | Vegetable smoothie                                         |
| 92510120 | Apple-cherry drink                                         |
| 92510150 | Apple juice drink                                          |
| 92510170 | Apple-cranberry-grape juice drink                          |
| 92510200 | Apple-orange-pineapple juice drink                         |
| 92510310 | Banana-orange drink                                        |
| 92510410 | Black cherry drink                                         |
| 92510610 | Fruit juice drink                                          |
| 92510630 | Fruit juice drink, NFS                                     |
| 92510650 | Tamarind drink                                             |
| 92510810 | Grapeade and grape drink                                   |
| 92510820 | Grape juice drink                                          |
| 92510910 | Grapefruit juice drink                                     |
| 92510950 | Guava juice drink                                          |
| 92510955 | Lemonade, fruit juice drink                                |
| 92510960 | Lemonade, fruit-flavored drink                             |
| 92511010 | Fruit-flavored drink (formerly lemonade)                   |
| 92511015 | Fruit-flavored drink                                       |
| 92511020 | Lemon-limeade                                              |
| 92511110 | Limeade                                                    |
| 92511190 | Orange Juice Drink                                         |
| 92511200 | Orange-mango juice drink                                   |
| 92511220 | Orange drink                                               |
| 92511240 | Orange-lemon drink                                         |
| 92511250 | Fruit juice beverage, 40-50% juice, citrus                 |
| 92511260 | Orange-cranberry juice drink                               |
| 92511270 | Orange-peach juice drink                                   |
| 92511280 | Orange-grape-banana juice drink                            |

Xiaoyu Bi -- Beverage consumption patterns among U.S. adolescents and adults from a 24-hour dietary recall survey conducted in 2021 compared to the National Health and Nutrition Examination Survey (NHANES) 2017-2018

|          |                                                                                                                      |
|----------|----------------------------------------------------------------------------------------------------------------------|
| 92511290 | Papaya juice drink                                                                                                   |
| 92511310 | Pineapple-grapefruit juice drink                                                                                     |
| 92511340 | Pineapple-orange juice drink                                                                                         |
| 92511350 | Orange-raspberry juice drink                                                                                         |
| 92511400 | Raspberry-flavored drink                                                                                             |
| 92511510 | Strawberry-flavored drink                                                                                            |
| 92512050 | Frozen daiquiri mix, from frozen concentrate, reconstituted                                                          |
| 92513000 | Fruit-flavored smoothie drink, frozen, no dairy                                                                      |
| 92513010 | Fruit-flavored smoothie drink, frozen, light, no dairy                                                               |
| 92520410 | Fruit drink, low calorie                                                                                             |
| 92520810 | Grape drink, low calorie                                                                                             |
| 92520910 | Lemonade, low calorie                                                                                                |
| 92530310 | Cherry drink with vitamin C added                                                                                    |
| 92530410 | Fruit-flavored drink, with high vitamin C                                                                            |
| 92530510 | Cranberry juice drink, with high vitamin C                                                                           |
| 92530520 | Cranberry-apple juice drink with vitamin C added                                                                     |
| 92530610 | Fruit juice drink, with high vitamin C                                                                               |
| 92530710 | Grape drink with vitamin C added                                                                                     |
| 92530810 | Grapefruit juice drink with vitamin C added                                                                          |
| 92530840 | Guava juice drink with vitamin C added                                                                               |
| 92530910 | Lemonade with vitamin C added                                                                                        |
| 92530950 | Vegetable and fruit juice drink, with high vitamin C                                                                 |
| 92531010 | Orange drink and orangeade with vitamin C added                                                                      |
| 92531020 | Orange breakfast drink, made from frozen concentrate                                                                 |
| 92531030 | Fruit juice drink (Sunny D)                                                                                          |
| 92531120 | Pineapple-orange juice drink with vitamin C added                                                                    |
| 92531210 | Strawberry-flavored drink with vitamin C added                                                                       |
| 92541010 | Fruit-flavored drink, powdered, reconstituted                                                                        |
| 92541020 | Lemonade-flavored drink, made from powdered mix, with sugar                                                          |
| 92541040 | Lemonade-flavored drink, made from powdered mix, low calorie                                                         |
| 92541100 | Apple cider-flavored drink, made from powdered mix, with sugar and vitamin C added                                   |
| 92542000 | Fruit-flavored drink, with high vitamin C, powdered, reconstituted                                                   |
| 92544000 | Fruit-flavored drink, made from unsweetened powdered mix (fortified with vitamin C), with sugar added in preparation |
| 92550030 | Fruit juice drink, with high vitamin C, light                                                                        |
| 92550035 | Fruit juice drink, light                                                                                             |
| 92550040 | Fruit juice drink, diet                                                                                              |
| 92550050 | Apple-white grape juice drink, low calorie, with vitamin C added                                                     |
| 92550110 | Cranberry juice drink, with high vitamin C, light                                                                    |
| 92550200 | Grape juice drink, light                                                                                             |
| 92550210 | Cranberry-apple juice drink, low calorie, with vitamin C added                                                       |

Xiaoyu Bi -- Beverage consumption patterns among U.S. adolescents and adults from a 24-hour dietary recall survey conducted in 2021 compared to the National Health and Nutrition Examination Survey (NHANES) 2017-2018

|                  |                                                                                       |
|------------------|---------------------------------------------------------------------------------------|
|                  | 92550300 Grapefruit juice drink, low calorie, with vitamin C added                    |
|                  | 92550350 Orange juice beverage, 40-50% juice, light                                   |
|                  | 92550360 Apple juice beverage, 40-50% juice, light                                    |
|                  | 92550370 Lemonade, fruit juice drink, light                                           |
|                  | 92550380 Pomegranate juice beverage, 40-50% juice, light                              |
|                  | 92550400 Vegetable and fruit juice drink, with high vitamin C, diet                   |
|                  | 92550405 Vegetable and fruit juice drink, with high vitamin C, light                  |
|                  | 92550610 Fruit-flavored drink, with high vitamin C, diet                              |
|                  | 92550620 Fruit-flavored drink, diet                                                   |
|                  | 92551600 Citrus Juice Drink, Low Calorie                                              |
|                  | 92551700 Juice drink, low calorie                                                     |
|                  | 92552000 Fruit-flavored drink, with high vitamin C, powdered, reconstituted, diet     |
|                  | 92552010 Fruit-flavored drink, powdered, reconstituted, diet                          |
|                  | 92552020 Fruit juice drink, reduced sugar (Sunny D)                                   |
|                  | 92552030 Fruit juice drink (Capri Sun)                                                |
|                  | 92552050 Orange Breakfast Drink, Low Calorie                                          |
|                  | 92552100 Orange-cranberry juice drink, low calorie, with vitamin C added              |
|                  | 92582100 Fruit juice drink, with high vitamin C, plus added calcium                   |
|                  | 92582110 Fruit juice drink, added calcium (Sunny D)                                   |
|                  | 92582120 Fruit-flavored drink, reduced sugar, with high vitamin C, plus added calcium |
|                  | 92731000 Fruit-flavored drink, non-carbonated, made from powdered mix, with sugar     |
|                  | 92741000 Fruit-flavored drink, non-carbonated, made from low calorie powdered mix     |
|                  | 95341000 FUZE Slenderize fortified low calorie fruit juice beverage                   |
|                  | 95342000 Fruit juice, acai blend                                                      |
| <b>Tap water</b> | 94000100 Water, tap                                                                   |
| <b>Tea</b>       | 92204000 Mate, sweetened beverage made from dried green leaves                        |
|                  | 92301000 Tea, NS as to type, unsweetened                                              |
|                  | 92301060 Tea, NS as to type, presweetened with sugar                                  |
|                  | 92301080 Tea, NS as to type, presweetened with low calorie sweetener                  |
|                  | 92301100 Tea, NS as to type, decaffeinated, unsweetened                               |
|                  | 92301130 Tea, NS as to type, presweetened, NS as to sweetener                         |
|                  | 92301160 Tea, NS as to type, decaffeinated, presweetened with sugar                   |
|                  | 92301180 Tea, NS as to type, decaffeinated, presweetened with low calorie sweetener   |
|                  | 92301190 Tea, NS as to type, decaffeinated, presweetened, NS as to sweetener          |
|                  | 92302000 Tea, hot, leaf, black                                                        |
|                  | 92302200 Tea, leaf, presweetened with sugar                                           |
|                  | 92302300 Tea, leaf, presweetened with low calorie sweetener                           |
|                  | 92302400 Tea, leaf, presweetened, NS as to sweetener                                  |
|                  | 92302500 Tea, hot, leaf, black, decaffeinated                                         |
|                  | 92302600 Tea, leaf, decaffeinated, presweetened with sugar                            |
|                  | 92302700 Tea, leaf, decaffeinated, presweetened with low calorie sweetener            |

Xiaoyu Bi -- Beverage consumption patterns among U.S. adolescents and adults from a 24-hour dietary recall survey conducted in 2021 compared to the National Health and Nutrition Examination Survey (NHANES) 2017-2018

|          |                                                                                    |
|----------|------------------------------------------------------------------------------------|
| 92302800 | Tea, leaf, decaffeinated, presweetened, NS as to sweetener                         |
| 92303010 | Tea, hot, leaf, green                                                              |
| 92303100 | Tea, hot, leaf, green, decaffeinated                                               |
| 92304000 | Tea, made from frozen concentrate, unsweetened                                     |
| 92304100 | Tea, hot, leaf, oolong                                                             |
| 92305000 | Tea, made from powdered instant, presweetened, NS as to sweetener                  |
| 92305010 | Tea, iced, instant, black, unsweetened                                             |
| 92305040 | Tea, iced, instant, black, pre-sweetened with sugar                                |
| 92305050 | Tea, iced, instant, black, decaffeinated, pre-sweetened with sugar                 |
| 92305090 | Tea, iced, instant, black, pre-sweetened with low calorie sweetener                |
| 92305110 | Tea, iced, instant, black, decaffeinated, pre-sweetened with low calorie sweetener |
| 92305180 | Tea, iced, instant, black, decaffeinated, unsweetened                              |
| 92305800 | Tea, made from powdered instant, decaffeinated, presweetened, NS as to sweetener   |
| 92305900 | Tea, iced, instant, green, unsweetened                                             |
| 92305910 | Tea, iced, instant, green, pre-sweetened with sugar                                |
| 92305920 | Tea, iced, instant, green, pre-sweetened with low calorie sweetener                |
| 92306000 | Tea, hot, herbal                                                                   |
| 92306020 | Tea, herbal, presweetened with sugar                                               |
| 92306030 | Tea, herbal, presweetened with low calorie sweetener                               |
| 92306040 | Tea, herbal, presweetened, NS as to sweetener                                      |
| 92306090 | Tea, hot, hibiscus                                                                 |
| 92306700 | Tea, hot, chamomile                                                                |
| 92306800 | Tea, hot, chai, with milk                                                          |
| 92307000 | Tea, iced, instant, black, unsweetened, dry                                        |
| 92307400 | Tea, iced, instant, black, pre-sweetened, dry                                      |
| 92307500 | Iced Tea / Lemonade juice drink                                                    |
| 92307510 | Iced Tea / Lemonade juice drink, light                                             |
| 92307520 | Iced Tea / Lemonade juice drink, diet                                              |
| 92308000 | Tea, iced, brewed, black, pre-sweetened with sugar                                 |
| 92308010 | Tea, iced, brewed, black, pre-sweetened with low calorie sweetener                 |
| 92308020 | Tea, iced, brewed, black, unsweetened                                              |
| 92308030 | Tea, iced, brewed, black, decaffeinated, pre-sweetened with sugar                  |
| 92308040 | Tea, iced, brewed, black, decaffeinated, pre-sweetened with low calorie sweetener  |
| 92308050 | Tea, iced, brewed, black, decaffeinated, unsweetened                               |
| 92308500 | Tea, iced, brewed, green, pre-sweetened with sugar                                 |
| 92308510 | Tea, iced, brewed, green, pre-sweetened with low calorie sweetener                 |
| 92308520 | Tea, iced, brewed, green, unsweetened                                              |
| 92308530 | Tea, iced, brewed, green, decaffeinated, pre-sweetened with sugar                  |
| 92308540 | Tea, iced, brewed, green, decaffeinated, pre-sweetened with low calorie sweetener  |



Xiaoyu Bi -- Beverage consumption patterns among U.S. adolescents and adults from a 24-hour dietary recall survey conducted in 2021 compared to the National Health and Nutrition Examination Survey (NHANES) 2017-2018

|  |                                                                |
|--|----------------------------------------------------------------|
|  | 92308550 Tea, iced, brewed, green, decaffeinated, unsweetened  |
|  | 92309000 Tea, iced, bottled, black                             |
|  | 92309010 Tea, iced, bottled, black, decaffeinated              |
|  | 92309020 Tea, iced, bottled, black, diet                       |
|  | 92309030 Tea, iced, bottled, black, decaffeinated, diet        |
|  | 92309040 Tea, iced, bottled, black, unsweetened                |
|  | 92309050 Tea, iced, bottled, black, decaffeinated, unsweetened |
|  | 92309500 Tea, iced, bottled, green                             |
|  | 92309510 Tea, iced, bottled, green, diet                       |
|  | 92309520 Tea, iced, bottled, green, unsweetened                |

Note: Codes in powdered form were converted to reconstituted/prepared amount.

Supplemental Table S2. Consumers and daily intakes (mL) for all beverage types combined and by beverage type among subgroups 13-19 y, 20-49 y, and 50-64 y

|                                        |                        | 13-19 y                     |                                | 20-49 y                      |                                 | 50-64 y                     |                                 |
|----------------------------------------|------------------------|-----------------------------|--------------------------------|------------------------------|---------------------------------|-----------------------------|---------------------------------|
| Beverage Type                          | Statistics (mL/day)    | ABA-BSW<br>2021<br>(n=2335) | NHANES<br>2017-2018<br>(n=916) | ABA-BSW<br>2021<br>(n=13475) | NHANES<br>2017-2018<br>(n=2136) | ABA-BSW<br>2021<br>(n=4743) | NHANES<br>2017-2018<br>(n=1384) |
|                                        |                        |                             |                                |                              |                                 |                             |                                 |
| All beverages<br>(excluding tap water) | % Consumers            | 97.9%                       | 94.2%                          | 99.0%                        | 96.5%                           | 98.5%                       | 99.1%                           |
|                                        | Per Capita Mean        | 1576                        | 1247                           | 1972                         | 1703                            | 1822                        | 1741                            |
|                                        | Per Consumer Estimates |                             |                                |                              |                                 |                             |                                 |
|                                        | Mean                   | 1610                        | 1324                           | 1993                         | 1765                            | 1850                        | 1757                            |
|                                        | P10                    | 375                         | 326                            | 472                          | 490                             | 547                         | 503                             |
|                                        | P25                    | 725                         | 594                            | 899                          | 870                             | 975                         | 869                             |
|                                        | P50                    | 1303                        | 1100                           | 1599                         | 1449                            | 1610                        | 1542                            |
|                                        | P75                    | 2196                        | 1698                           | 2627                         | 2262                            | 2439                        | 2316                            |
|                                        | P90                    | 3171                        | 2467                           | 3895                         | 3355                            | 3441                        | 3292                            |
|                                        | P90:P10 ratio          | 8                           | 8                              | 8                            | 7                               | 6                           | 7                               |
| Bottled water                          | % Consumers            | 62.4%                       | 49.0%                          | 48.2%                        | 51.3%                           | 42.9%                       | 50.6%                           |
|                                        | Per Capita Mean        | 559                         | 577                            | 405                          | 748                             | 415                         | 639                             |
|                                        | Per Consumer Estimates |                             |                                |                              |                                 |                             |                                 |
|                                        | Mean                   | 895                         | 1178                           | 842                          | 1457                            | 966                         | 1262                            |
|                                        | P10                    | 181                         | 315                            | 159                          | 360                             | 260                         | 360                             |
|                                        | P25                    | 361                         | 507                            | 318                          | 507                             | 414                         | 507                             |
|                                        | P50                    | 681                         | 887                            | 572                          | 1029                            | 827                         | 1014                            |
|                                        | P75                    | 1282                        | 1521                           | 1147                         | 1920                            | 1371                        | 1680                            |
|                                        | P90                    | 1972                        | 2195                           | 2008                         | 3030                            | 2068                        | 2535                            |
|                                        | P90:P10 ratio          | 11                          | 7                              | 13                           | 8                               | 8                           | 7                               |
| CSD (total)                            | % Consumers            | 44.1%                       | 40.8%                          | 56.9%                        | 35.3%                           | 50.3%                       | 34.4%                           |
|                                        | Per Capita Mean        | 233                         | 208                            | 404                          | 247                             | 415                         | 244                             |
|                                        | Per Consumer Estimates |                             |                                |                              |                                 |                             |                                 |
|                                        | Mean                   | 528                         | 510                            | 710                          | 699                             | 826                         | 710                             |
|                                        | P10                    | 114                         | 161                            | 125                          | 217                             | 186                         | 161                             |

Xiaoyu Bi -- Beverage consumption patterns among U.S. adolescents and adults from a 24-hour dietary recall survey conducted in 2021 compared to the National Health and Nutrition Examination Survey (NHANES) 2017-2018

| Beverage Type | Statistics (mL/day)    | 13-19 y          |                      | 20-49 y           |                       | 50-64 y          |                       |
|---------------|------------------------|------------------|----------------------|-------------------|-----------------------|------------------|-----------------------|
|               |                        | ABA-BSW          | NHANES               | ABA-BSW           | NHANES                | ABA-BSW          | NHANES                |
|               |                        | 2021<br>(n=2335) | 2017-2018<br>(n=916) | 2021<br>(n=13475) | 2017-2018<br>(n=2136) | 2021<br>(n=4743) | 2017-2018<br>(n=1384) |
|               | P25                    | 181              | 326                  | 260               | 334                   | 315              | 333                   |
|               | P50                    | 364              | 388                  | 520               | 496                   | 591              | 496                   |
|               | P75                    | 675              | 620                  | 903               | 899                   | 1072             | 805                   |
|               | P90                    | 1182             | 973                  | 1513              | 1364                  | 1688             | 1364                  |
|               | P90:P10 ratio          | 10               | 6                    | 12                | 6                     | 9                | 8                     |
| Regular CSD   | % Consumers            | 40.0%            | 37.5%                | 49.5%             | 30.8%                 | 32.8%            | 24.9%                 |
|               | Per Capita Mean        | 208              | 192                  | 335               | 205                   | 249              | 161                   |
|               | Per Consumer Estimates |                  |                      |                   |                       |                  |                       |
|               | Mean                   | 521              | 512                  | 677               | 665                   | 758              | 646                   |
|               | P10                    | 114              | 155                  | 114               | 217                   | 181              | 161                   |
|               | P25                    | 181              | 287                  | 250               | 334                   | 296              | 310                   |
|               | P50                    | 361              | 403                  | 472               | 478                   | 591              | 403                   |
|               | P75                    | 666              | 635                  | 887               | 805                   | 1005             | 744                   |
|               | P90                    | 1144             | 1000                 | 1478              | 1364                  | 1608             | 1240                  |
|               | P90:P10 ratio          | 10               | 6                    | 13                | 6                     | 9                | 8                     |
| LNCS CSD      | % Consumers            | 6.0%             | 3.9%                 | 12.4%             | 5.0%                  | 19.5%            | 10.3%                 |
|               | Per Capita Mean        | 24               | 16                   | 68                | 42                    | 167              | 83                    |
|               | Per Consumer Estimates |                  |                      |                   |                       |                  |                       |
|               | Mean                   | 405              | 409                  | 551               | 841                   | 857              | 806                   |
|               | P10                    | 100              | 240                  | 110               | 265                   | 204              | 240                   |
|               | P25                    | 181              | 360                  | 181               | 360                   | 296              | 345                   |
|               | P50                    | 296              | 360                  | 364               | 495                   | 591              | 600                   |
|               | P75                    | 536              | 360                  | 682               | 1080                  | 1126             | 1080                  |
|               | P90                    | 832              | 949                  | 1245              | 2094                  | 1766             | 1521                  |
|               | P90:P10 ratio          | 8                | 4                    | 11                | 8                     | 9                | 6                     |
| Coffee        | % Consumers            | 28.0%            | 11.6%                | 56.4%             | 47.8%                 | 62.4%            | 62.9%                 |

Xiaoyu Bi -- Beverage consumption patterns among U.S. adolescents and adults from a 24-hour dietary recall survey conducted in 2021 compared to the National Health and Nutrition Examination Survey (NHANES) 2017-2018

| Beverage Type         | Statistics (mL/day)    | 13-19 y          |                      | 20-49 y           |                       | 50-64 y          |                       |
|-----------------------|------------------------|------------------|----------------------|-------------------|-----------------------|------------------|-----------------------|
|                       |                        | ABA-BSW          | NHANES               | ABA-BSW           | NHANES                | ABA-BSW          | NHANES                |
|                       |                        | 2021<br>(n=2335) | 2017-2018<br>(n=916) | 2021<br>(n=13475) | 2017-2018<br>(n=2136) | 2021<br>(n=4743) | 2017-2018<br>(n=1384) |
|                       | Per Capita Mean        | 124              | 44                   | 259               | 257                   | 362              | 374                   |
|                       | Per Consumer Estimates |                  |                      |                   |                       |                  |                       |
|                       | Mean                   | 443              | 377                  | 459               | 537                   | 581              | 594                   |
|                       | P10                    | 125              | 180                  | 125               | 180                   | 208              | 240                   |
|                       | P25                    | 224              | 255                  | 224               | 255                   | 281              | 315                   |
|                       | P50                    | 355              | 326                  | 355               | 372                   | 472              | 450                   |
|                       | P75                    | 556              | 496                  | 591               | 620                   | 710              | 720                   |
|                       | P90                    | 851              | 543                  | 944               | 960                   | 1180             | 1080                  |
|                       | P90:P10 ratio          | 7                | 3                    | 8                 | 5                     | 6                | 5                     |
| Dairy-based beverages | % Consumers            | 15.5%            | 11.7%                | 16.9%             | 3.8%                  | 10.3%            | 3.8%                  |
|                       | Per Capita Mean        | 46               | 39                   | 57                | 18                    | 32               | 14                    |
|                       | Per Consumer Estimates |                  |                      |                   |                       |                  |                       |
|                       | Mean                   | 298              | 335                  | 334               | 474                   | 317              | 377                   |
|                       | P10                    | 69               | 124                  | 74                | 186                   | 95               | 189                   |
|                       | P25                    | 125              | 248                  | 125               | 248                   | 159              | 264                   |
|                       | P50                    | 247              | 248                  | 247               | 368                   | 260              | 391                   |
|                       | P75                    | 369              | 432                  | 414               | 543                   | 414              | 473                   |
|                       | P90                    | 591              | 496                  | 654               | 899                   | 591              | 543                   |
|                       | P90:P10 ratio          | 9                | 4                    | 9                 | 5                     | 6                | 3                     |
| Energy drinks         | % Consumers            | 14.1%            | 1.2%                 | 26.8%             | 4.7%                  | 8.8%             | 2.4%                  |
|                       | Per Capita Mean        | 66               | 7                    | 111               | 26                    | 40               | 14                    |
|                       | Per Consumer Estimates |                  |                      |                   |                       |                  |                       |
|                       | Mean                   | 470              | 577                  | 416               | 561                   | 456              | 575                   |
|                       | P10                    | 125              | 372                  | 112               | 252                   | 125              | 120                   |
|                       | P25                    | 260              | 480                  | 181               | 372                   | 186              | 124                   |
|                       | P50                    | 414              | 496                  | 296               | 496                   | 414              | 248                   |
|                       | P75                    | 536              | 729                  | 536               | 744                   | 536              | 620                   |

Xiaoyu Bi -- Beverage consumption patterns among U.S. adolescents and adults from a 24-hour dietary recall survey conducted in 2021 compared to the National Health and Nutrition Examination Survey (NHANES) 2017-2018

| Beverage Type         | Statistics (mL/day)    | 13-19 y          |                      | 20-49 y           |                       | 50-64 y          |                       |
|-----------------------|------------------------|------------------|----------------------|-------------------|-----------------------|------------------|-----------------------|
|                       |                        | ABA-BSW          | NHANES               | ABA-BSW           | NHANES                | ABA-BSW          | NHANES                |
|                       |                        | 2021<br>(n=2335) | 2017-2018<br>(n=916) | 2021<br>(n=13475) | 2017-2018<br>(n=2136) | 2021<br>(n=4743) | 2017-2018<br>(n=1384) |
| Flavored water        | P90                    | 830              | 930                  | 827               | 960                   | 887              | 1800                  |
|                       | P90:P10 ratio          | 7                | 3                    | 7                 | 4                     | 7                | 15                    |
|                       | % Consumers            | 13.1%            | 1.4%                 | 18.6%             | 2.0%                  | 10.1%            | 2.9%                  |
|                       | Per Capita Mean        | 70               | 5                    | 107               | 14                    | 72               | 20                    |
|                       | Per Consumer Estimates |                  |                      |                   |                       |                  |                       |
|                       | Mean                   | 536              | 362                  | 577               | 705                   | 707              | 676                   |
|                       | P10                    | 110              | 180                  | 114               | 360                   | 181              | 120                   |
|                       | P25                    | 189              | 180                  | 235               | 435                   | 296              | 495                   |
|                       | P50                    | 414              | 315                  | 414               | 600                   | 536              | 525                   |
|                       | P75                    | 722              | 507                  | 732               | 960                   | 1013             | 960                   |
|                       | P90                    | 1089             | 720                  | 1214              | 1080                  | 1486             | 1521                  |
|                       | P90:P10 ratio          | 10               | 4                    | 11                | 3                     | 8                | 13                    |
|                       | % Consumers            | 7.4%             | 3.4%                 | 11.7%             | 5.5%                  | 6.5%             | 3.4%                  |
|                       | Per Capita Mean        | 27               | 18                   | 44                | 24                    | 23               | 13                    |
| Nutritional beverages | Per Consumer Estimates |                  |                      |                   |                       |                  |                       |
|                       | Mean                   | 364              | 541                  | 375               | 437                   | 363              | 371                   |
|                       | P10                    | 79               | 192                  | 79                | 217                   | 116              | 213                   |
|                       | P25                    | 159              | 240                  | 159               | 240                   | 181              | 248                   |
|                       | P50                    | 296              | 480                  | 296               | 384                   | 296              | 336                   |
|                       | P75                    | 414              | 640                  | 414               | 541                   | 414              | 384                   |
|                       | P90                    | 827              | 1280                 | 676               | 720                   | 591              | 640                   |
|                       | P90:P10 ratio          | 11               | 7                    | 9                 | 3                     | 5                | 3                     |
| Plain milk            | % Consumers            | 22.7%            | 14.3%                | 25.4%             | 8.3%                  | 20.8%            | 11.4%                 |
|                       | Per Capita Mean        | 84               | 51                   | 96                | 34                    | 77               | 42                    |
|                       | Per Consumer Estimates |                  |                      |                   |                       |                  |                       |
|                       | Mean                   | 372              | 357                  | 378               | 404                   | 370              | 373                   |

Xiaoyu Bi -- Beverage consumption patterns among U.S. adolescents and adults from a 24-hour dietary recall survey conducted in 2021 compared to the National Health and Nutrition Examination Survey (NHANES) 2017-2018

| Beverage Type      | Statistics (mL/day)    | 13-19 y          |                      | 20-49 y           |                       | 50-64 y          |                       |
|--------------------|------------------------|------------------|----------------------|-------------------|-----------------------|------------------|-----------------------|
|                    |                        | ABA-BSW          | NHANES               | ABA-BSW           | NHANES                | ABA-BSW          | NHANES                |
|                    |                        | 2021<br>(n=2335) | 2017-2018<br>(n=916) | 2021<br>(n=13475) | 2017-2018<br>(n=2136) | 2021<br>(n=4743) | 2017-2018<br>(n=1384) |
|                    | P10                    | 74               | 153                  | 76                | 153                   | 112              | 153                   |
|                    | P25                    | 134              | 244                  | 150               | 244                   | 181              | 229                   |
|                    | P50                    | 260              | 336                  | 261               | 320                   | 296              | 336                   |
|                    | P75                    | 410              | 442                  | 415               | 488                   | 414              | 503                   |
|                    | P90                    | 675              | 534                  | 784               | 808                   | 720              | 534                   |
|                    | P90:P10 ratio          | 9                | 4                    | 10                | 5                     | 6                | 4                     |
| Plant-based drinks | % Consumers            | 5.4%             | 3.1%                 | 11.5%             | 4.5%                  | 8.8%             | 4.8%                  |
|                    | Per Capita Mean        | 15               | 8                    | 38                | 10                    | 28               | 9                     |
|                    | Per Consumer Estimates |                  |                      |                   |                       |                  |                       |
|                    | Mean                   | 285              | 272                  | 327               | 232                   | 324              | 190                   |
|                    | P10                    | 74               | 107                  | 63                | 31                    | 48               | 61                    |
|                    | P25                    | 114              | 173                  | 125               | 107                   | 125              | 61                    |
|                    | P50                    | 204              | 320                  | 249               | 244                   | 208              | 122                   |
|                    | P75                    | 323              | 351                  | 414               | 356                   | 361              | 259                   |
|                    | P90                    | 572              | 351                  | 650               | 397                   | 650              | 366                   |
|                    | P90:P10 ratio          | 8                | 3                    | 10                | 13                    | 14               | 6                     |
| Plant water        | % Consumers            | 2.8%             | 0.2%                 | 1.8%              | 0.7%                  | 1.2%             | 0.4%                  |
|                    | Per Capita Mean        | 10               | 1                    | 8                 | 4                     | 6                | 2                     |
|                    | Per Consumer Estimates |                  |                      |                   |                       |                  |                       |
|                    | Mean                   | 357              | 463                  | 440               | 604                   | 545              | 525                   |
|                    | P10                    | 63               | 80                   | 112               | 300                   | 114              | 240                   |
|                    | P25                    | 159              | 480                  | 204               | 600                   | 261              | 360                   |
|                    | P50                    | 296              | 480                  | 406               | 690                   | 414              | 525                   |
|                    | P75                    | 536              | 480                  | 536               | 690                   | 648              | 525                   |
|                    | P90                    | 536              | 630                  | 783               | 690                   | 1241             | 720                   |
|                    | P90:P10 ratio          | 9                | 8                    | 7                 | 2                     | 11               | 3                     |
|                    | % Consumers            | 19.6%            | 7.9%                 | 23.6%             | 4.8%                  | 11.9%            | 3.1%                  |

Xiaoyu Bi -- Beverage consumption patterns among U.S. adolescents and adults from a 24-hour dietary recall survey conducted in 2021 compared to the National Health and Nutrition Examination Survey (NHANES) 2017-2018

| Beverage Type                          | Statistics (mL/day)    | 13-19 y          |                      | 20-49 y           |                       | 50-64 y          |                       |
|----------------------------------------|------------------------|------------------|----------------------|-------------------|-----------------------|------------------|-----------------------|
|                                        |                        | ABA-BSW          | NHANES               | ABA-BSW           | NHANES                | ABA-BSW          | NHANES                |
|                                        |                        | 2021<br>(n=2335) | 2017-2018<br>(n=916) | 2021<br>(n=13475) | 2017-2018<br>(n=2136) | 2021<br>(n=4743) | 2017-2018<br>(n=1384) |
| Sports drinks                          | Per Capita Mean        | 102              | 45                   | 118               | 33                    | 66               | 22                    |
|                                        | Per Consumer Estimates |                  |                      |                   |                       |                  |                       |
|                                        | Mean                   | 519              | 572                  | 499               | 693                   | 557              | 714                   |
|                                        | P10                    | 125              | 217                  | 112               | 310                   | 138              | 248                   |
|                                        | P25                    | 186              | 372                  | 186               | 372                   | 296              | 372                   |
|                                        | P50                    | 414              | 620                  | 410               | 620                   | 414              | 744                   |
|                                        | P75                    | 650              | 744                  | 650               | 930                   | 650              | 744                   |
|                                        | P90                    | 1080             | 992                  | 1072              | 992                   | 1072             | 992                   |
|                                        | P90:P10 ratio          | 9                | 5                    | 10                | 3                     | 8                | 4                     |
| Still juices and fruit-flavored drinks | % Consumers            | 39.6%            | 32.1%                | 36.6%             | 24.1%                 | 26.6%            | 24.4%                 |
|                                        | Per Capita Mean        | 180              | 146                  | 177               | 117                   | 117              | 107                   |
|                                        | Per Consumer Estimates |                  |                      |                   |                       |                  |                       |
|                                        | Mean                   | 455              | 456                  | 482               | 484                   | 442              | 437                   |
|                                        | P10                    | 114              | 155                  | 114               | 155                   | 112              | 109                   |
|                                        | P25                    | 181              | 233                  | 186               | 242                   | 181              | 186                   |
|                                        | P50                    | 328              | 349                  | 338               | 357                   | 328              | 345                   |
|                                        | P75                    | 556              | 543                  | 591               | 543                   | 536              | 524                   |
|                                        | P90                    | 968              | 899                  | 984               | 870                   | 960              | 861                   |
|                                        | P90:P10 ratio          | 9                | 6                    | 9                 | 6                     | 9                | 8                     |
| Tea                                    | % Consumers            | 20.3%            | 19.8%                | 36.3%             | 27.3%                 | 32.3%            | 32.2%                 |
|                                        | Per Capita Mean        | 93               | 96                   | 170               | 171                   | 194              | 241                   |
|                                        | Per Consumer Estimates |                  |                      |                   |                       |                  |                       |
|                                        | Mean                   | 458              | 485                  | 467               | 628                   | 602              | 748                   |
|                                        | P10                    | 125              | 184                  | 110               | 195                   | 181              | 195                   |
|                                        | P25                    | 208              | 248                  | 204               | 300                   | 236              | 345                   |
|                                        | P50                    | 355              | 372                  | 355               | 496                   | 414              | 599                   |
|                                        | P75                    | 536              | 543                  | 577               | 761                   | 710              | 913                   |

Xiaoyu Bi -- Beverage consumption patterns among U.S. adolescents and adults from a 24-hour dietary recall survey conducted in 2021 compared to the National Health and Nutrition Examination Survey (NHANES) 2017-2018

| Beverage Type          | Statistics (mL/day)    | 13-19 y                     |                                | 20-49 y                      |                                 | 50-64 y                     |                                 |
|------------------------|------------------------|-----------------------------|--------------------------------|------------------------------|---------------------------------|-----------------------------|---------------------------------|
|                        |                        | ABA-BSW<br>2021<br>(n=2335) | NHANES<br>2017-2018<br>(n=916) | ABA-BSW<br>2021<br>(n=13475) | NHANES<br>2017-2018<br>(n=2136) | ABA-BSW<br>2021<br>(n=4743) | NHANES<br>2017-2018<br>(n=1384) |
|                        | P90                    | 934                         | 989                            | 947                          | 1240                            | 1246                        | 1522                            |
|                        | P90:P10 ratio          | 7                           | 5                              | 9                            | 6                               | 7                           | 8                               |
| Tap water <sup>1</sup> | % Consumers            | 77.4%                       | 47.1%                          | 84.7%                        | 47.6%                           | 77.8%                       | 45.0%                           |
|                        | Per Capita Mean        | 735                         | 465                            | 870                          | 734                             | 784                         | 590                             |
|                        | Per Consumer Estimates |                             |                                |                              |                                 |                             |                                 |
|                        | Mean                   | 950                         | 988                            | 1027                         | 1542                            | 1008                        | 1312                            |
|                        | P10                    | 250                         | 278                            | 250                          | 315                             | 250                         | 240                             |
|                        | P25                    | 375                         | 435                            | 375                          | 585                             | 375                         | 525                             |
|                        | P50                    | 750                         | 740                            | 750                          | 1200                            | 750                         | 1014                            |
|                        | P75                    | 1250                        | 1275                           | 1250                         | 2067                            | 1250                        | 1890                            |
|                        | P90                    | 1750                        | 2029                           | 1750                         | 3240                            | 1750                        | 2670                            |
|                        | P90:P10 ratio          | 7                           | 7                              | 7                            | 10                              | 7                           | 11                              |

<sup>1</sup> Estimates for tap water not directly comparable between surveys as NHANES estimates are based on 24-hr dietary recalls while ABA-BSW estimates are based on typical daily amounts from a FFQ (tap water was not an option to select in the online 24-hr dietary recall survey for ABA-BSW%).



Supplemental Table S3A. Beverage COs among ages 13-19 years

| Beverage Type                          | ABA-BSW<br>2021                        |         |       | NHANES<br>2017-2018       |         |       |
|----------------------------------------|----------------------------------------|---------|-------|---------------------------|---------|-------|
|                                        | Total<br>Number<br>of COs <sup>1</sup> | Average |       | Total<br>Number<br>of COs | Average |       |
|                                        |                                        | COs/day | mL/CO |                           | COs/day | mL/CO |
| All beverages (excluding tap water)    | 12146                                  | 5.4     | 300   | 2417                      | 2.8     | 467   |
| Bottled water                          | 3802                                   | 2.7     | 328   | 807                       | 1.8     | 656   |
| CSD (total)                            | 2000                                   | 1.9     | 273   | 478                       | 1.3     | 402   |
| Regular CSD                            | 1771                                   | 1.9     | 275   | 449                       | 1.3     | 409   |
| LNCS CSD                               | 229                                    | 1.6     | 261   | 29                        | 1.2     | 334   |
| Coffee                                 | 920                                    | 1.4     | 313   | 100                       | 1.1     | 338   |
| Dairy-based drinks                     | 447                                    | 1.3     | 226   | 108                       | 1.2     | 288   |
| Energy drinks                          | 439                                    | 1.4     | 344   | 11                        | 1.0     | 551   |
| Flavored water                         | 554                                    | 1.9     | 284   | 14                        | 1.1     | 340   |
| Nutritional beverages                  | 210                                    | 1.4     | 264   | 25                        | 1.3     | 425   |
| Plain milk                             | 691                                    | 1.4     | 261   | 149                       | 1.2     | 309   |
| Plant-based drinks                     | 169                                    | 1.3     | 216   | 27                        | 1.1     | 258   |
| Plant water                            | 94                                     | 1.4     | 255   | 4                         | 1.2     | 383   |
| Sports drinks                          | 604                                    | 1.4     | 364   | 77                        | 1.1     | 525   |
| Still juices and fruit-flavored drinks | 1472                                   | 1.6     | 278   | 421                       | 1.3     | 350   |
| Tea                                    | 744                                    | 1.5     | 299   | 196                       | 1.2     | 415   |

<sup>1</sup> Unweighted number of COs; all other statistics are appropriately weighted using survey weights.

Supplemental Table S3B. Beverage COs among ages among ages 20-49 years

| Beverage Type                          | ABA-BSW<br>2021                        |         |       | NHANES<br>2017-2018       |         |       |
|----------------------------------------|----------------------------------------|---------|-------|---------------------------|---------|-------|
|                                        | Total<br>Number<br>of COs <sup>1</sup> | Average |       | Total<br>Number<br>of COs | Average |       |
|                                        |                                        | COs/day | mL/CO |                           | COs/day | mL/CO |
| All beverages (excluding tap water)    | 86892                                  | 6.5     | 304   | 6982                      | 3.3     | 534   |
| Bottled water                          | 15482                                  | 2.4     | 345   | 2335                      | 2.0     | 735   |
| CSD (total)                            | 16960                                  | 2.2     | 325   | 1213                      | 1.5     | 473   |
| Regular CSD                            | 14098                                  | 2.1     | 324   | 1063                      | 1.4     | 460   |
| LNCS CSD                               | 2862                                   | 1.7     | 326   | 150                       | 1.5     | 549   |
| Coffee                                 | 12841                                  | 1.7     | 275   | 1136                      | 1.2     | 433   |
| Dairy-based drinks                     | 2901                                   | 1.3     | 251   | 113                       | 1.1     | 444   |
| Energy drinks                          | 4959                                   | 1.4     | 296   | 93                        | 1.0     | 541   |
| Flavored water                         | 4738                                   | 1.9     | 298   | 38                        | 1.3     | 532   |
| Nutritional beverages                  | 2153                                   | 1.4     | 269   | 93                        | 1.2     | 357   |
| Plain milk                             | 4693                                   | 1.4     | 263   | 210                       | 1.2     | 349   |
| Plant-based drinks                     | 1979                                   | 1.3     | 244   | 101                       | 1.4     | 166   |
| Plant water                            | 324                                    | 1.3     | 329   | 16                        | 1.6     | 368   |
| Sports drinks                          | 4363                                   | 1.4     | 346   | 121                       | 1.1     | 638   |
| Still juices and fruit-flavored drinks | 7473                                   | 1.6     | 303   | 761                       | 1.2     | 396   |
| Tea                                    | 8026                                   | 1.6     | 285   | 752                       | 1.3     | 481   |

<sup>1</sup> Unweighted number of COs; all other statistics are appropriately weighted using survey weights.

Supplemental Table S3C. Beverage COs among ages among ages 50-64 years

| Beverage Type                          | ABA-BSW<br>2021                        |         |       | NHANES<br>2017-2018       |         |       |
|----------------------------------------|----------------------------------------|---------|-------|---------------------------|---------|-------|
|                                        | Total<br>Number<br>of COs <sup>1</sup> | Average |       | Total<br>Number<br>of COs | Average |       |
|                                        |                                        | COs/day | mL/CO |                           | COs/day | mL/CO |
| All beverages (excluding tap water)    | 25473                                  | 5.4     | 341   | 4896                      | 3.6     | 487   |
| Bottled water                          | 5290                                   | 2.6     | 370   | 1656                      | 2.1     | 605   |
| CSD (total)                            | 5275                                   | 2.2     | 378   | 675                       | 1.5     | 462   |
| Regular CSD                            | 3286                                   | 2.1     | 364   | 524                       | 1.5     | 445   |
| LNCS CSD                               | 1989                                   | 2.1     | 400   | 151                       | 1.6     | 499   |
| Coffee                                 | 5524                                   | 1.9     | 312   | 1017                      | 1.3     | 460   |
| Dairy-based drinks                     | 549                                    | 1.2     | 263   | 54                        | 1.1     | 355   |
| Energy drinks                          | 517                                    | 1.4     | 332   | 22                        | 1.2     | 474   |
| Flavored water                         | 949                                    | 2.0     | 357   | 36                        | 1.5     | 447   |
| Nutritional beverages                  | 381                                    | 1.3     | 287   | 37                        | 1.1     | 329   |
| Plain milk                             | 1235                                   | 1.3     | 289   | 150                       | 1.1     | 333   |
| Plant-based drinks                     | 493                                    | 1.2     | 259   | 66                        | 1.2     | 160   |
| Plant water                            | 79                                     | 1.7     | 312   | 11                        | 1.0     | 525   |
| Sports drinks                          | 699                                    | 1.4     | 413   | 52                        | 1.2     | 607   |
| Still juices and fruit-flavored drinks | 1828                                   | 1.5     | 299   | 492                       | 1.3     | 338   |
| Tea                                    | 2654                                   | 1.8     | 340   | 628                       | 1.5     | 500   |

<sup>1</sup> Unweighted number of COs; all other statistics are appropriately weighted using survey weights.

Xiaoyu Bi -- Beverage consumption patterns among U.S. adolescents and adults from a 24-hour dietary recall survey conducted in 2021 compared to the National Health and Nutrition Examination Survey (NHANES) 2017-2018

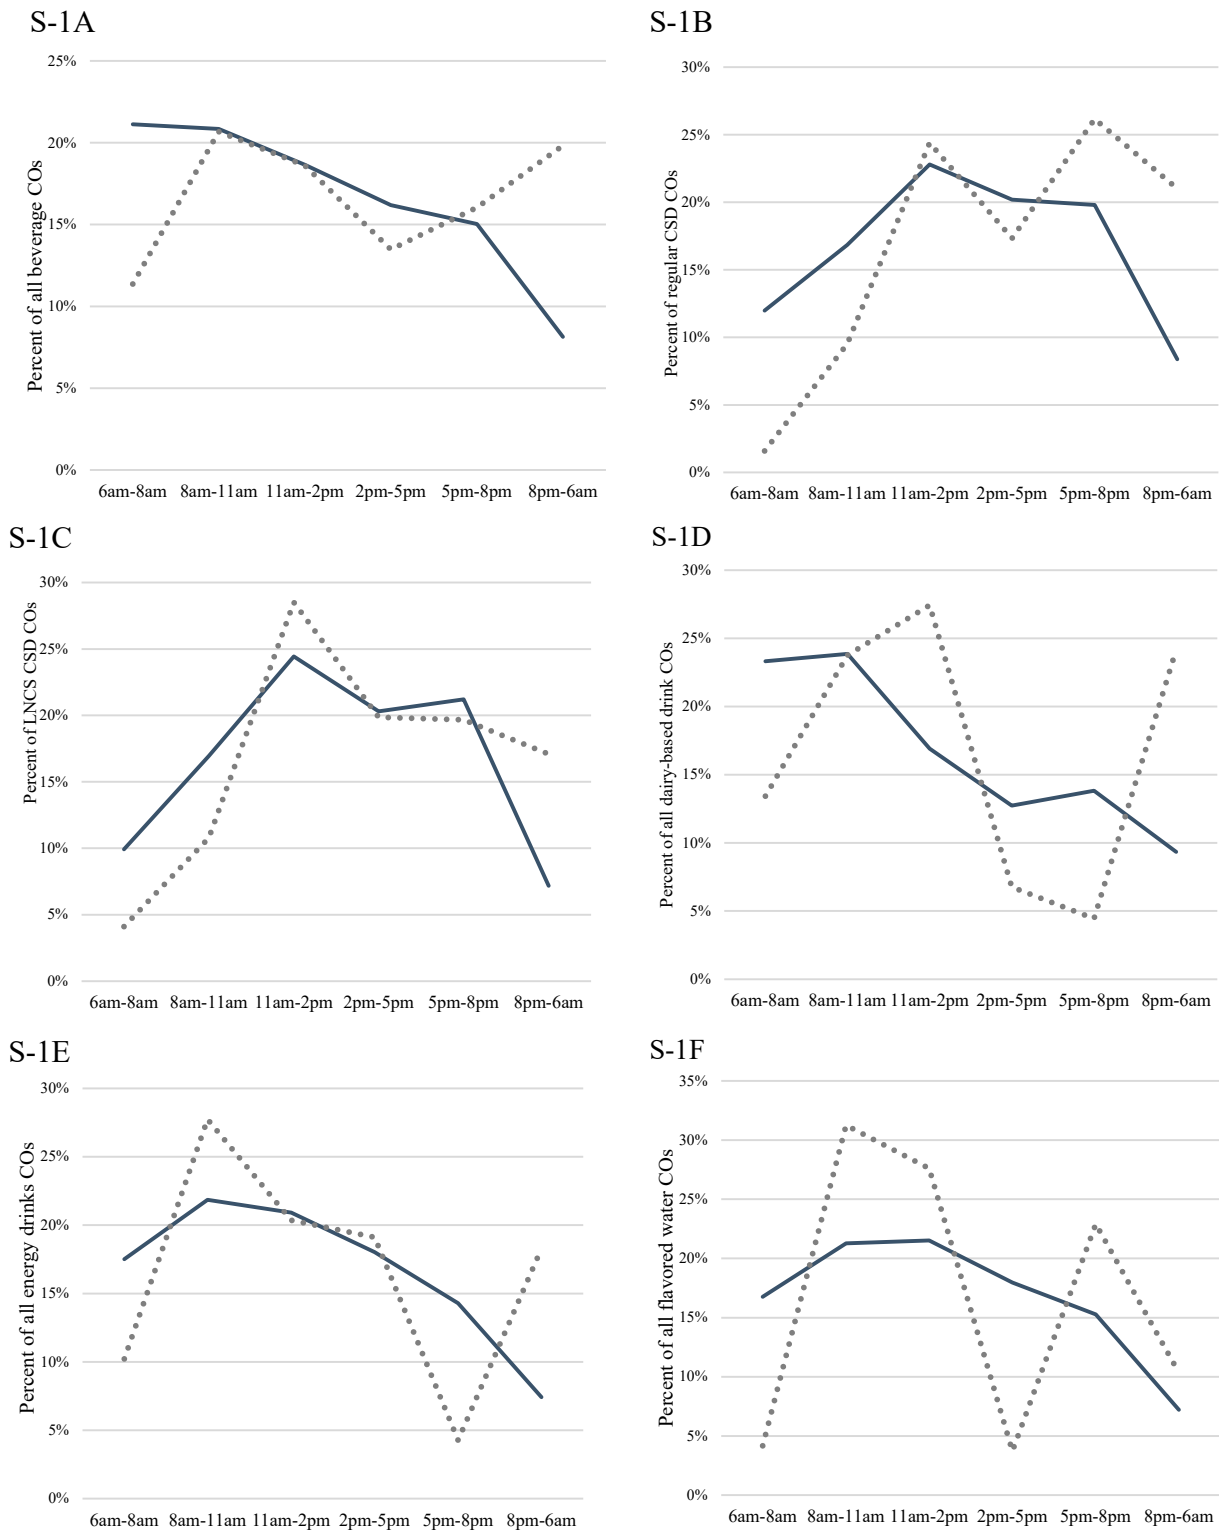

Xiaoyu Bi -- Beverage consumption patterns among U.S. adolescents and adults from a 24-hour dietary recall survey conducted in 2021 compared to the National Health and Nutrition Examination Survey (NHANES) 2017-2018

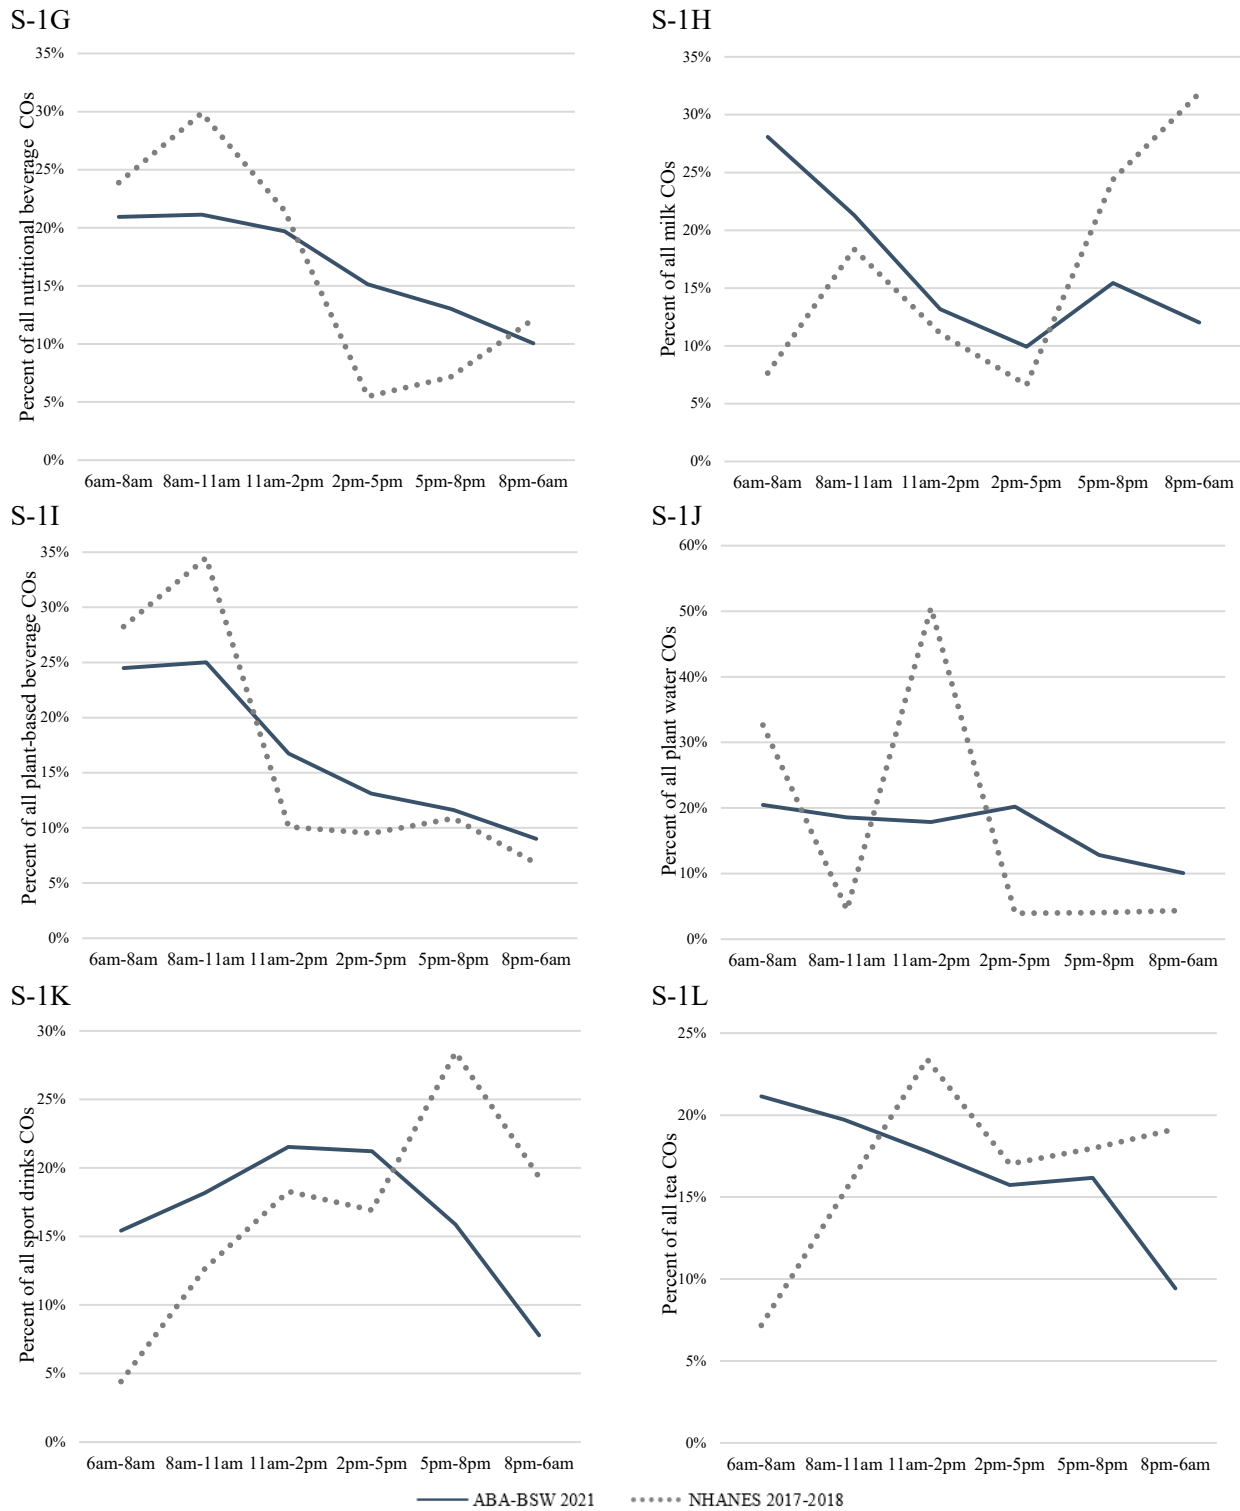

Supplemental Figure S1. Percentage of distribution of beverage COs within six time intervals among consumer ages 13-64 years by survey; (1A) all beverage types combined, (1B) Regular CSD, (1C) LNCS CSD, (1D) dairy-based drinks, (1E) energy drinks, (1F) flavored water, (1G) nutritional beverages, (1H) plain milk, (1I) plant-based drinks, (1J) plant water, (1K) sport drinks, and (1L) tea.
